# Supplementary material
Source: publisher figshare collection journal article supplement (https://acs.figshare.com/ndownloader/files/18046568)
Supplement: Supplementary file 1 [file 18046568]

## Supporting Information

# Bi-Objective Optimization of Interplant Integration Using Pinch Analysis

Shweta Kamat<sup>1</sup>

Pranjal Chokhani<sup>2</sup>

and

Santanu Bandyopadhyay<sup>1\*</sup>

*<sup>1</sup>Department of Energy Science and Engineering*

*<sup>2</sup>Department of Chemical Engineering,*

*Indian Institute of Technology Bombay,*

*Powai, Mumbai 400076, India*

---

\* Corresponding author. Tel.: +91 22 25767894; Fax: +91 22 25726875.

E-mail address: santanub@iitb.ac.in (S. Bandyopadhyay).

## Supporting Information

Supporting information for the manuscript is provided in this document.

Differentiating features of single plant and interplant integration

Table S1: Characteristics of single plant versus interplant integration

| Characteristics         | Single plant integration                               | Interplant integration                                                                                              |
|-------------------------|--------------------------------------------------------|---------------------------------------------------------------------------------------------------------------------|
| Freshwater conservation | Freshwater consumption is reduced                      | More freshwater can be conserved as compared to single plant integration                                            |
| Piping cost             | Insignificant due to short distances between processes | Large due to long distances between plants                                                                          |
| Benefits                | The plant is benefitted through freshwater saving      | All plants might not be benefitted as freshwater is saved at the cost of additional piping and pumping requirements |
| Issues of conflicts     | None                                                   | Sharing financial benefits, treatment of waste, maintenance of pipelines, operation of pumps, etc.                  |
| Process data sharing    | Complete transparency                                  | Incomplete data sharing (results in mixing of sources before transfer to the other plant)                           |
| Effects of downtime     | Affected by its own downtime                           | Affected by its own downtime as well as the downtime of participating industries                                    |

## Limiting process data for the Illustrative Examples

Table S2: Limiting process data for Example 1<sup>52</sup>.

| Plant | Sources | Flow rate (t/h) | Quality (ppm) | Demands | Flow rate (t/h) | Quality (ppm) |
|-------|---------|-----------------|---------------|---------|-----------------|---------------|
| A     | S1      | 20              | 100           | D1      | 20              | 0             |
|       | S2      | 66.67           | 80            | D2      | 66.67           | 50            |
|       | S3      | 100             | 100           | D3      | 100             | 50            |
|       | S4      | 41.67           | 800           | D4      | 41.67           | 80            |
|       | S5      | 10              | 800           | D5      | 10              | 400           |
| B     | S6      | 20              | 100           | D6      | 20              | 0             |
|       | S7      | 80              | 50            | D7      | 80              | 25            |
|       | S8      | 50              | 125           | D8      | 50              | 25            |
|       | S9      | 40              | 800           | D9      | 40              | 50            |
|       | S10     | 300             | 150           | D10     | 300             | 100           |

Table S3: Limiting process data for Example 2<sup>5</sup>

| Plant | Sources | Flow rate (t/h) | Quality (ppm) | Demands | Flow rate (t/h) | Quality (ppm) |
|-------|---------|-----------------|---------------|---------|-----------------|---------------|
| A     | S1      | 20              | 100           | D1      | 20              | 0             |
|       | S2      | 66.67           | 80            | D2      | 66.67           | 50            |
|       | S3      | 72.7            | 100           | D3      | 100             | 50            |
|       | S4      | 41.67           | 800           | D4      | 41.67           | 80            |
|       | S5      | 10              | 800           | D5      | 10              | 400           |
| B     | S6      | 20              | 100           | D6      | 20              | 0             |
|       | S7      | 66.67           | 80            | D7      | 66.67           | 50            |
|       | S8      | 25              | 400           | D8      | 15.63           | 80            |
|       | S9      | 42.86           | 800           | D9      | 42.86           | 100           |
|       | S10     | 6.67            | 1000          | D10     | 10              | 200           |
|       |         |                 |               | D11     | 6.67            | 400           |

Table S4: Limiting process data for Example 3<sup>15</sup>

| Plant | Sources | Flow rate<br>(Nm <sup>3</sup> /h) | Purity<br>(fraction) | Impurity<br>(fraction) | Demands | Flow rate<br>(Nm <sup>3</sup> /h) | Purity<br>(fraction) | Impurity<br>(fraction) |
|-------|---------|-----------------------------------|----------------------|------------------------|---------|-----------------------------------|----------------------|------------------------|
| A     | CRU     | 17,303                            | 0.8                  | 0.2                    | HCU     | 93,306                            | 0.8671               | 0.1329                 |
|       | HCU     | 60,678                            | 0.8                  | 0.2                    | GOHT    | 82,656                            | 0.8358               | 0.1642                 |
|       | GOHT    | 55,281                            | 0.75                 | 0.25                   | RHT     | 39,164                            | 0.8257               | 0.1743                 |
|       | RHT     | 25,870                            | 0.75                 | 0.25                   | DHT     | 12,472                            | 0.7487               | 0.2513                 |
|       | DHT     | 8,004                             | 0.7                  | 0.30                   | NHT     | 5,726                             | 0.7265               | 0.2735                 |
|       | NHT     | 3,840                             | 0.65                 | 0.35                   |         |                                   |                      |                        |
| B     | SRU     | 50,303                            | 0.93                 | 0.07                   | HCU     | 2,01,197                          | 0.8061               | 0.1939                 |
|       | CRU     | 33,530                            | 0.8                  | 0.2                    | NHT     | 14,531                            | 0.7885               | 0.2115                 |
|       | HCU     | 1,45,305                          | 0.75                 | 0.25                   | DHT     | 44,707                            | 0.7757               | 0.2243                 |
|       | NHT     | 11,177                            | 0.75                 | 0.25                   | CNHT    | 58,117                            | 0.7514               | 0.2486                 |
|       | DHT     | 27,942                            | 0.73                 | 0.27                   |         |                                   |                      |                        |
|       | CNHT    | 36,885                            | 0.7                  | 0.30                   |         |                                   |                      |                        |

Table S5: Limiting process data for Example 4<sup>23</sup>

| Plant | Sources | Flow rate<br>(t/h) | Resistivity<br>(M $\Omega$ ) | Quality<br>(M $\Omega$ ) <sup>-1</sup> | Demands | Flow rate<br>(t/h) | Resistivity<br>(M $\Omega$ ) | Quality<br>(M $\Omega$ ) <sup>-1</sup> |
|-------|---------|--------------------|------------------------------|----------------------------------------|---------|--------------------|------------------------------|----------------------------------------|
| A     | S1      | 250                | 1                            | 1                                      | D1      | 500                | 7                            | 0.143                                  |
|       | S2      | 200                | 2                            | 0.5                                    | D2      | 450                | 8                            | 0.125                                  |
|       | S3      | 350                | 3                            | 0.333                                  | D3      | 700                | 10                           | 0.1                                    |
|       | S4      | 300                | 0.1                          | 10                                     | D4      | 350                | 5                            | 0.2                                    |
|       | S5      | 200                | 2                            | 0.5                                    |         |                    |                              |                                        |
|       | S6      | 280                | 0.5                          | 2                                      |         |                    |                              |                                        |
| B     | S7      | 227.12             | 8                            | 0.125                                  | D5      | 182                | 16                           | 0.0625                                 |
|       | S8      | 227.12             | 2                            | 0.5                                    | D6      | 159                | 10                           | 0.1                                    |

Plots showing the reflected LCC of plant A\* and LCC of plant B, along with the interplant flow line for intermediate points of the Pareto front.

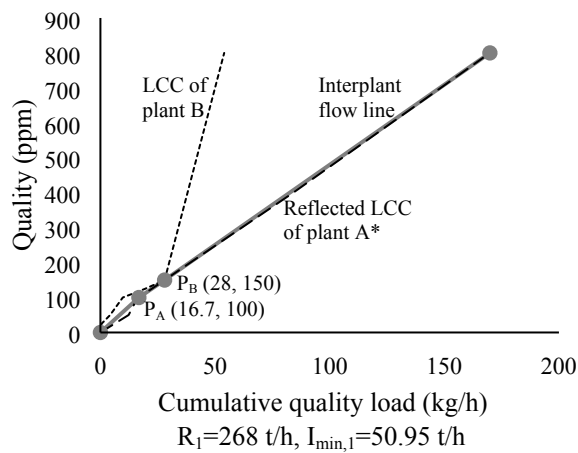

Figure S1: Interplant flow line for the second point on Pareto front for Example 1

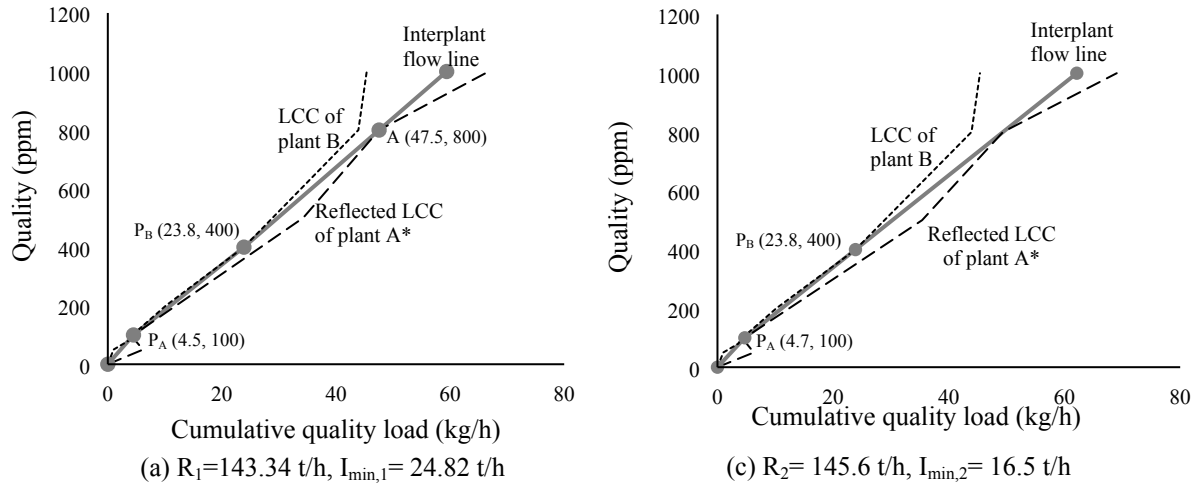

Figure S2: Interplant flow line for the second and third point on Pareto front for Example 2

Plots showing the reflected LCC of plant A\* and LCC of plant B, along with the interplant flow line for the points of the Pareto front.

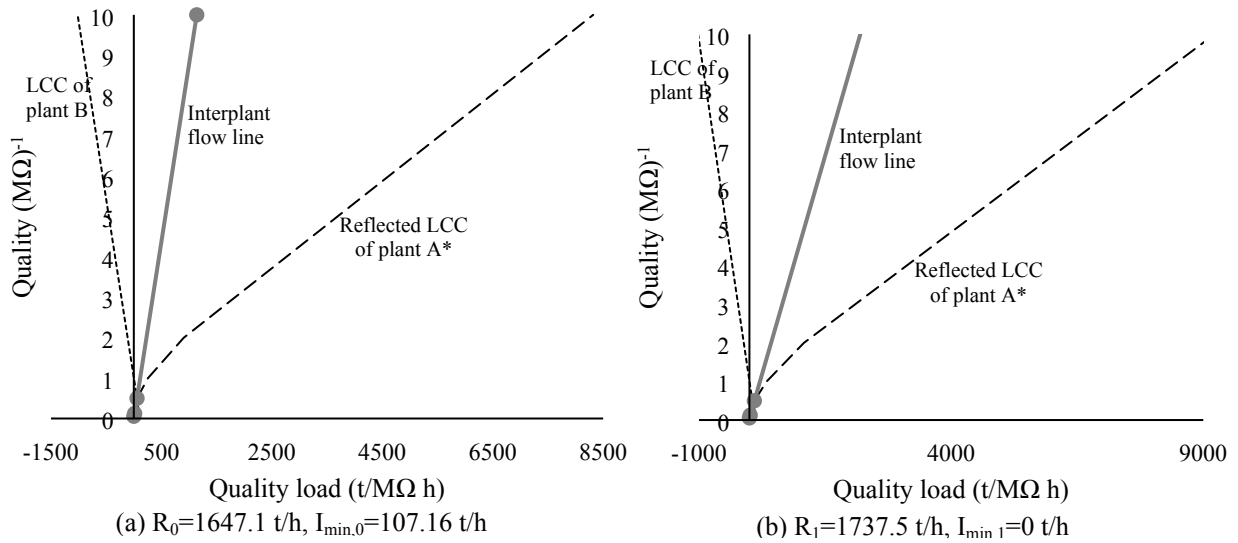

Figure S3: Interplant flow and freshwater consumption for Example 4
